# Supplementary material for: Preparation of protein imprinted polymer beads by Pickering emulsion polymerization
Source: Royal Society of Chemistry journal article supplement (doi:10.1039/c4tb01605j), 2014-12-17
Supplement: c4tb01605j1.pdf [file c4tb01605j1.pdf]

*Electronic Supplementary Information*

## Preparation of Protein Imprinted Polymer Beads by Pickering Emulsion Polymerization

Tongchang Zhou,<sup>a,c</sup> Ka Zhang,<sup>a</sup> Tripta Kamra,<sup>a,b</sup> Leif Bülow<sup>a</sup> and Lei Ye<sup>\*a</sup>

<sup>a</sup> Division of Pure and Applied Biochemistry, Lund University, Box 124, 221 00 Lund, Sweden.

<sup>b</sup> Division of Synchrotron Radiation Research, Lund University, Box 118, 221 00 Lund, Sweden.

<sup>c</sup> Guangzhou Pharmaceutical Holdings, Ltd., Guangzhou 510130, China

\* Corresponding author:

Lei Ye, Tel. +46 46 2229560; Fax +46 46 2224611; Email: Lei.Ye@tbiokem.lth.se

### Effect of nanoparticle modification on Pickering emulsion stabilities

Three types of Pickering emulsions were prepared by shaking different silica nanoparticles (with and without being treated with haemoglobin or Triton X-100) with the monomer and the water phases. The emulsions were left to stand at ambient temperature for 1 h before their optical images were taken (Fig. S1).

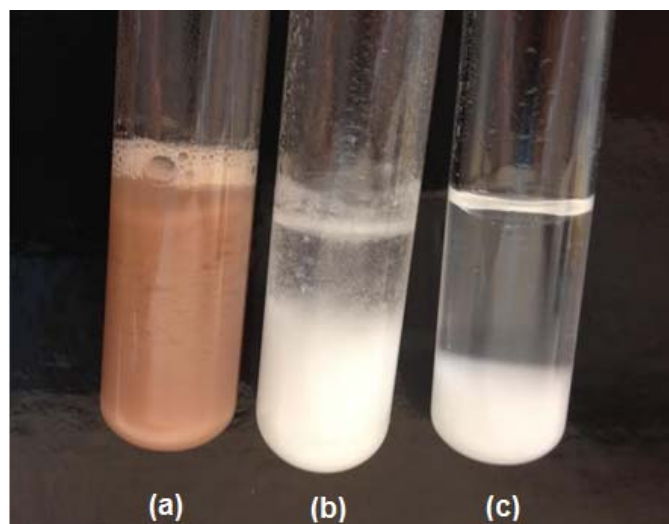

**Fig. S1.** Pickering emulsions of monomer in water stabilized by (a) silica treated with hemoglobin, (b) silica treated with Triton X-100, (c) silica.

## Protein activity analysis

The bound Hb was eluted with 1 mL phosphate buffer (20 mM, pH 8.0). To determine the functionality of the eluted Hb, the Hb solution was firstly reduced with sodium dithionite and then gently bubbled with CO or O<sub>2</sub>. The different oxidation states of Hb were monitored by UV-vis spectrophotometer at room temperature immediately after the preparation. In Fig. S2, the obtained UV spectra of Hb-CO and Hb-O<sub>2</sub> are in agreement with the characteristic spectra reported in the literature.<sup>1</sup> The results show that the eluted Hb maintains its activity after the adsorption and desorption processes.

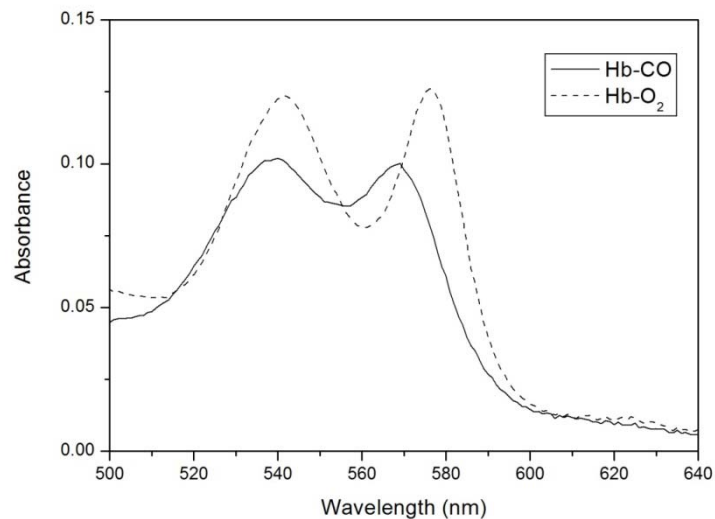

**Fig. S2.** Absorption spectra of hemoglobin. Hb-CO: Hb treated with CO, Hb-O<sub>2</sub>: Hb treated with O<sub>2</sub>.

## Reference

1. W. G. Zijlstra and A. Buursma, *Comp Biochem Phys B*, 1987, **88**, 251-255.
